# Supplementary material for: An Integrating Immune-Related Signature to Improve Prognosis of Hepatocellular Carcinoma
Source: Hindawi journal article supplement (doi:10.1155/2020/8872329), 2020-11-03
Supplement: f1 [file 8872329.f1.zip]

# ***Supplementary Material***

## *—Supplementary Figure and Table*

### **An integrating immune-related signature to improve prognosis of hepatocellular carcinoma**

Rui Zhu,<sup>1,2</sup> Wenna Guo,<sup>3</sup> Xin-Jian Xu,<sup>1</sup> and Liucun Zhu<sup>2</sup>

<sup>1</sup> Department of Mathematics, Shanghai University, Shanghai, 200444, China.

<sup>2</sup> School of Life Sciences, Shanghai University, Shanghai, 200444, China.

<sup>3</sup> School of Life Sciences, Zhengzhou University, Zhengzhou, Henan, 450001, China.

Correspondence should be addressed to Liucun Zhu; zhuliucun@shu.edu.cn and Xin-Jian Xu; xinjxu@shu.edu.cn

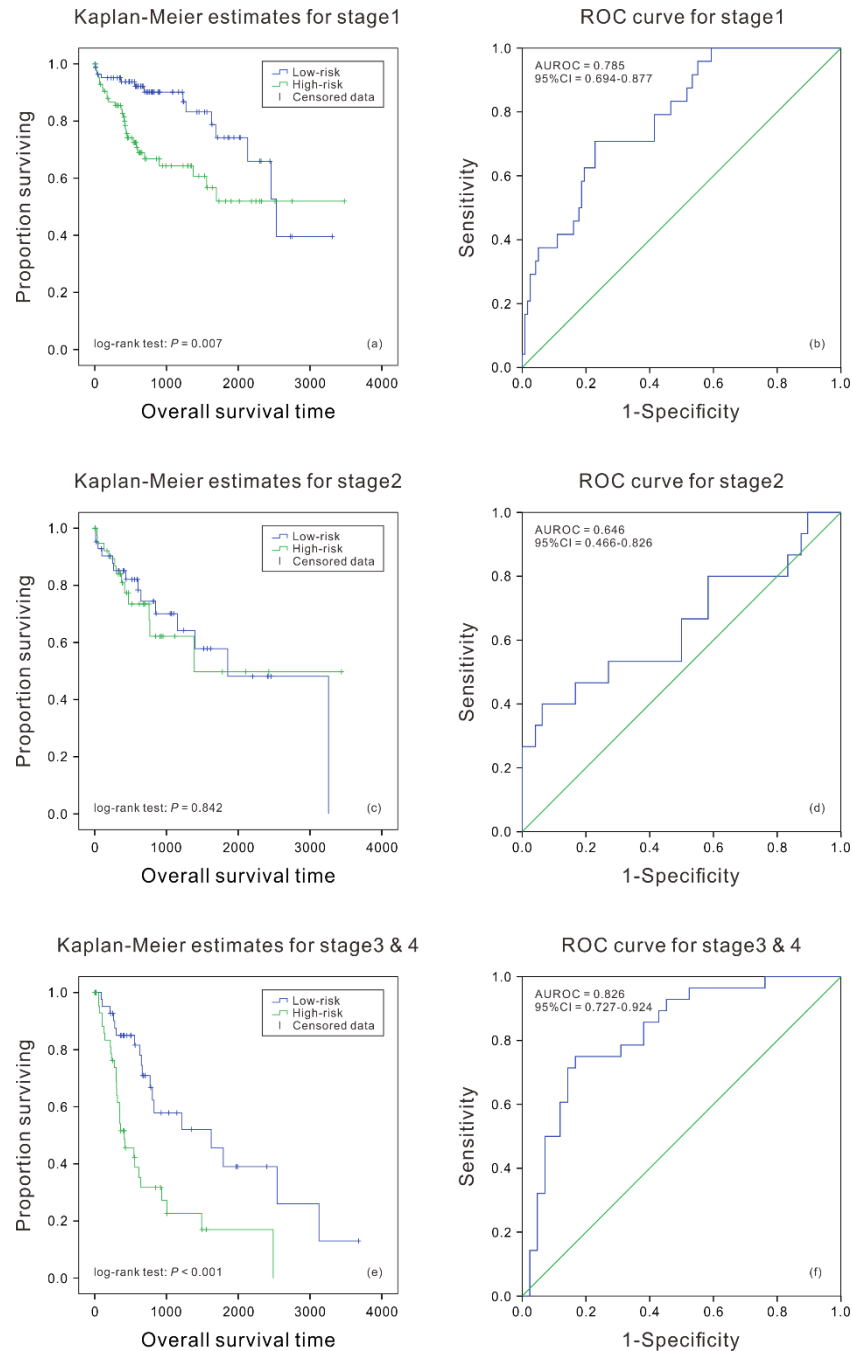

**Supplementary Figure 1.** Kaplan-Meier and the ROC curves in different clinical stages. It can be concluded that higher risk scores are significantly associated with overall survival time in stage 1 and stage3&4 ( $P = 0.007$ ,  $P < 0.001$ ). The AUC were 0.785(95% CI = 0.694-0.877) and 0.826 (95% CI = 0.727-0.927) in stage 1 and stage3&4.

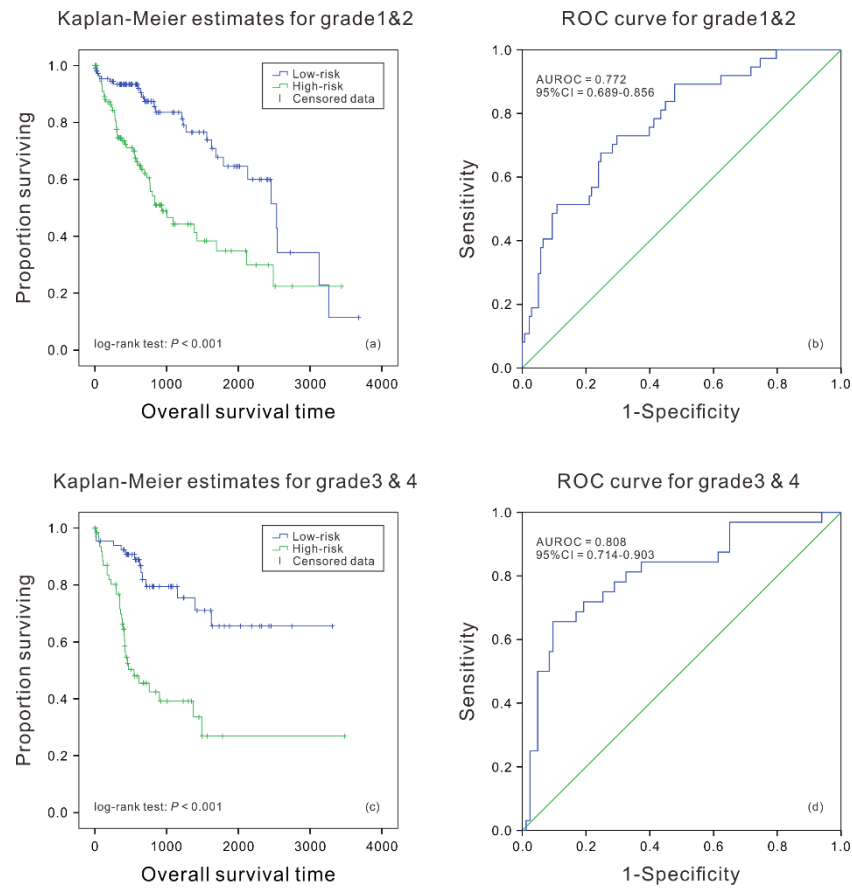

**Supplementary Figure 2.** Kaplan-Meier and the ROC curves in different tumor grades. It can be concluded that higher risk scores are significantly associated with overall survival time in different pathological grades ( $P < 0.001$ ,  $P < 0.001$ ). The AUC were 0.772 (95% CI = 0.689- 0.856) and 0.808 (95% CI = 0.714-0.903).

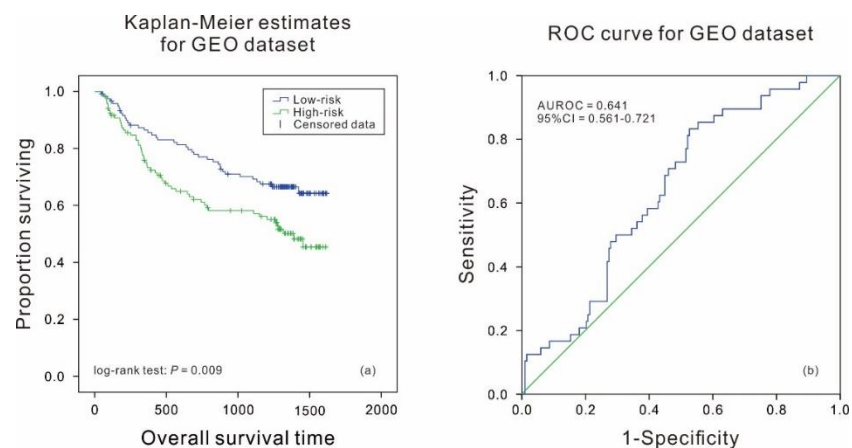

**Supplementary Figure 3.** Kaplan-Meier and the ROC curves in the GEO validation dataset. The results of two-sided log-rank test performed on the survival time between the low- and high-risk curves showed a significantly difference ( $P = 0.009$ ) (a). ROC curve of survival prediction in the GEO validation dataset (b).

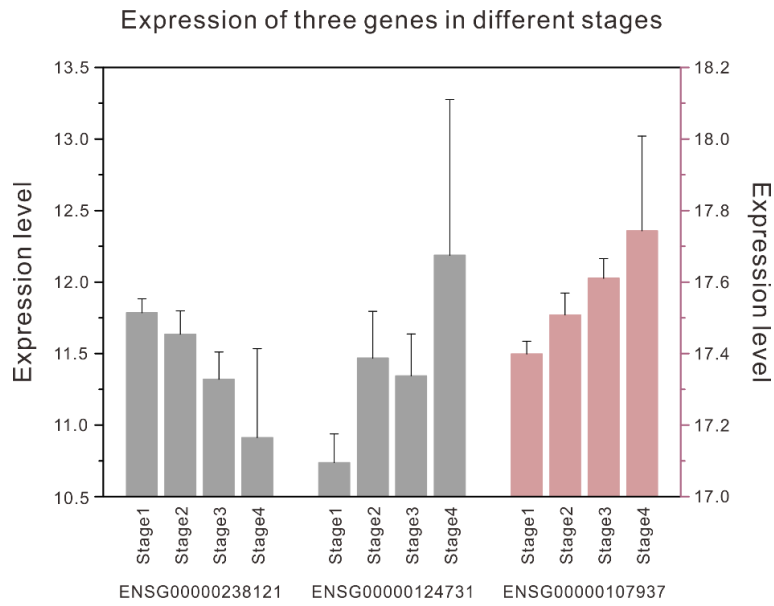

**Supplementary Figure 4.** Histogram of differential expressions of the 3 RNA prognostic biomarkers in different clinical stages.

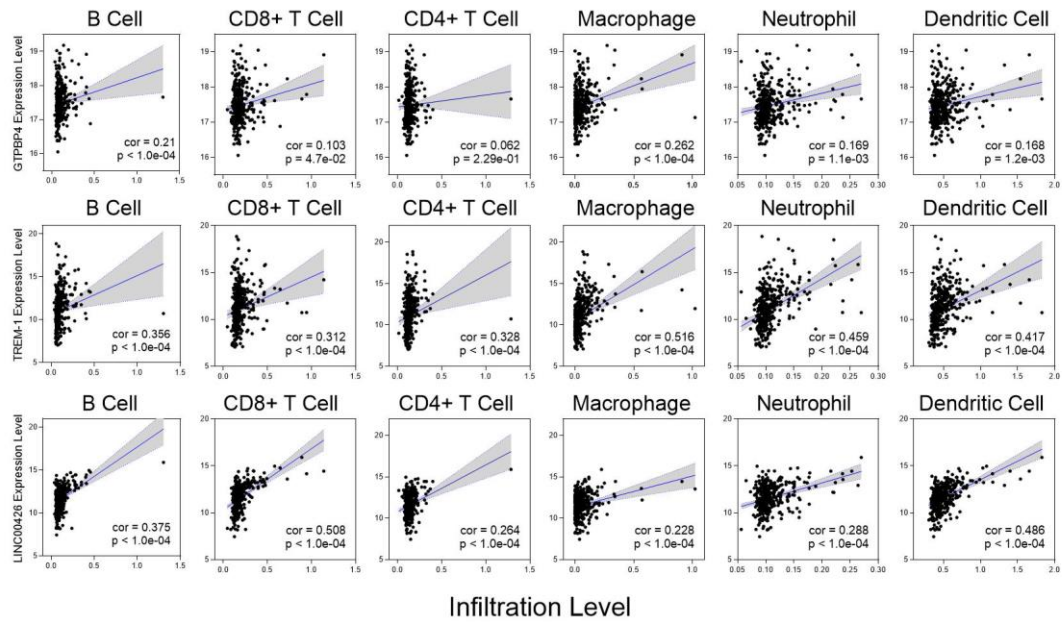

**Supplementary Figure 5.** The scatter plot of immune cell infiltration analysis.

**Supplementary Table 1.** The accession codes of TCGA of the 377 HCC specimens

| Accession codes |              |              |              |              |
|-----------------|--------------|--------------|--------------|--------------|
| TCGA-RC-A6M5    | TCGA-G3-A25T | TCGA-CC-A8HU | TCGA-DD-AAVQ | TCGA-DD-AAW2 |
| TCGA-MI-A75I    | TCGA-DD-AACK | TCGA-DD-A1E9 | TCGA-5C-A9VG | TCGA-G3-A5SK |
| TCGA-RC-A7S9    | TCGA-BD-A2L6 | TCGA-CC-A8HV | TCGA-GJ-A3OU | TCGA-CC-A3MC |
| TCGA-G3-A5SJ    | TCGA-RG-A7D4 | TCGA-2Y-A9H1 | TCGA-BW-A5NQ | TCGA-DD-AAVP |
| TCGA-ED-A7XP    | TCGA-DD-AADN | TCGA-BC-A10R | TCGA-DD-AAE3 | TCGA-DD-AAD5 |
| TCGA-DD-AAE9    | TCGA-G3-A6UC | TCGA-XR-A8TF | TCGA-ZS-A9CG | TCGA-K7-AAU7 |
| TCGA-DD-AACI    | TCGA-DD-A11C | TCGA-G3-AAV4 | TCGA-CC-A7II | TCGA-G3-A3CH |
| TCGA-3K-AAZ8    | TCGA-DD-AADE | TCGA-CC-A8HT | TCGA-DD-A4NJ | TCGA-LG-A9QC |
| TCGA-T1-A6J8    | TCGA-G3-A3CI | TCGA-DD-AACZ | TCGA-BC-A3KG | TCGA-DD-AACS |
| TCGA-G3-AAUZ    | TCGA-G3-A7M5 | TCGA-DD-A4NG | TCGA-DD-AAD8 | TCGA-DD-A1EH |
| TCGA-KR-A7K7    | TCGA-DD-A1EI | TCGA-2Y-A9H5 | TCGA-DD-AACX | TCGA-DD-AACN |
| TCGA-DD-AAVR    | TCGA-DD-A73G | TCGA-ZP-A9CV | TCGA-2Y-A9HB | TCGA-DD-AADA |
| TCGA-ZP-A9CY    | TCGA-DD-AAEI | TCGA-UB-A7MD | TCGA-BD-A3ER | TCGA-G3-A5SM |
| TCGA-G3-A25U    | TCGA-XR-A8TC | TCGA-DD-A4NN | TCGA-ZP-A9D1 | TCGA-CC-A9FW |
| TCGA-DD-AAW0    | TCGA-CC-A9FU | TCGA-DD-A3A5 | TCGA-DD-AACY | TCGA-G3-A25Z |
| TCGA-BD-A3EP    | TCGA-UB-A7ME | TCGA-BC-4072 | TCGA-G3-A7M8 | TCGA-ED-A66Y |
| TCGA-CC-A7IJ    | TCGA-DD-AADO | TCGA-DD-AACL | TCGA-ZP-A9D0 | TCGA-DD-A1EF |
| TCGA-ZS-A9CF    | TCGA-LG-A6GG | TCGA-CC-A7IE | TCGA-DD-AAW1 | TCGA-CC-5263 |
| TCGA-DD-AAD2    | TCGA-DD-A4NH | TCGA-BC-A112 | TCGA-DD-AACW | TCGA-BC-A10S |
| TCGA-DD-AACP    | TCGA-DD-A73C | TCGA-NI-A4U2 | TCGA-DD-A73D | TCGA-HP-A5MZ |
| TCGA-DD-AADY    | TCGA-DD-AAD6 | TCGA-2Y-A9GY | TCGA-2Y-A9H4 | TCGA-GJ-A9DB |
| TCGA-DD-AACA    | TCGA-DD-AADB | TCGA-2Y-A9GT | TCGA-DD-AAVY | TCGA-PD-A5DF |
| TCGA-WQ-A9G7    | TCGA-RC-A7SF | TCGA-DD-AACG | TCGA-DD-AAD1 | TCGA-UB-A7MF |
| TCGA-DD-A73E    | TCGA-CC-A7IH | TCGA-DD-A3A4 | TCGA-KR-A7K8 | TCGA-DD-A39W |
| TCGA-ED-A8O5    | TCGA-CC-A9FV | TCGA-CC-A1HT | TCGA-DD-AADU | TCGA-ZP-A9D2 |
| TCGA-UB-A7MC    | TCGA-WJ-A86L | TCGA-BC-A5W4 | TCGA-DD-AACO | TCGA-DD-A4NQ |
| TCGA-5C-AAPD    | TCGA-K7-A5RF | TCGA-CC-A5UE | TCGA-DD-AAE2 | TCGA-CC-A8HS |
| TCGA-FV-A4ZQ    | TCGA-DD-AAVS | TCGA-DD-A39Y | TCGA-DD-A73F | TCGA-FV-A3R2 |
| TCGA-DD-AADJ    | TCGA-BC-A69I | TCGA-ES-A2HS | TCGA-DD-AACJ | TCGA-DD-A1EL |
| TCGA-DD-AADQ    | TCGA-G3-AAV0 | TCGA-KR-A7K0 | TCGA-UB-AA0U | TCGA-CC-A7IK |
| TCGA-BC-A3KF    | TCGA-DD-AAEE | TCGA-BC-A110 | TCGA-ED-A66X | TCGA-DD-A114 |
| TCGA-MI-A75H    | TCGA-RC-A7SB | TCGA-HP-A5N0 | TCGA-DD-AAEG | TCGA-DD-A39X |
| TCGA-DD-AAE1    | TCGA-G3-A7M7 | TCGA-DD-A1EG | TCGA-XR-A8TD | TCGA-EP-A2KB |
| TCGA-DD-AAEK    | TCGA-DD-A4NF | TCGA-DD-A115 | TCGA-ED-A7XO | TCGA-DD-A39Z |
| TCGA-FV-A495    | TCGA-ED-A459 | TCGA-4R-AA8I | TCGA-WX-AA44 | TCGA-DD-A3A8 |
| TCGA-MI-A75C    | TCGA-G3-A5SL | TCGA-DD-A3A6 | TCGA-2Y-A9GU | TCGA-CC-5262 |
| TCGA-2Y-A9H0    | TCGA-QA-A7B7 | TCGA-DD-A3A2 | TCGA-DD-A1EC | TCGA-2Y-A9GV |
| TCGA-DD-AAE6    | TCGA-ZS-A9CE | TCGA-DD-A4NK | TCGA-ED-A97K | TCGA-2Y-A9HA |
| TCGA-DD-AAVW    | TCGA-DD-AAE4 | TCGA-BC-A10Y | TCGA-BW-A5NO | TCGA-CC-A3M9 |

|              |              |              |              |              |
|--------------|--------------|--------------|--------------|--------------|
| TCGA-UB-AA0V | TCGA-DD-AADK | TCGA-ED-A8O6 | TCGA-DD-A4NB | TCGA-YA-A8S7 |
| TCGA-G3-A3CG | TCGA-DD-A4NA | TCGA-DD-A4NE | TCGA-G3-A3CJ | TCGA-G3-A7M9 |
| TCGA-DD-A73A | TCGA-ED-A627 | TCGA-DD-AA3A | TCGA-DD-A118 | TCGA-DD-A3A3 |
| TCGA-MI-A75E | TCGA-DD-A1EB | TCGA-CC-5261 | TCGA-BC-A8YO | TCGA-DD-A116 |
| TCGA-G3-AAV3 | TCGA-DD-A11A | TCGA-CC-A7IF | TCGA-DD-A4NO | TCGA-CC-A5UD |
| TCGA-K7-A5RG | TCGA-G3-AAV5 | TCGA-CC-A7IG | TCGA-DD-AADR | TCGA-ES-A2HT |
| TCGA-DD-AADP | TCGA-DD-AAE0 | TCGA-DD-AADC | TCGA-RC-A6M6 | TCGA-DD-A11B |
| TCGA-DD-A4NL | TCGA-BC-A216 | TCGA-CC-5258 | TCGA-MI-A75G | TCGA-EP-A2KA |
| TCGA-WQ-AB4B | TCGA-K7-A6G5 | TCGA-DD-A39V | TCGA-WX-AA46 | TCGA-FV-A3I1 |
| TCGA-ZP-A9CZ | TCGA-DD-AAEA | TCGA-2Y-A9GS | TCGA-XR-A8TG | TCGA-WX-AA47 |
| TCGA-UB-A7MB | TCGA-XR-A8TE | TCGA-BC-A10T | TCGA-G3-AAV7 | TCGA-FV-A3R3 |
| TCGA-DD-AACV | TCGA-2Y-A9H7 | TCGA-DD-A3A0 | TCGA-DD-AACT | TCGA-2Y-A9GW |
| TCGA-DD-AAVX | TCGA-DD-AACU | TCGA-CC-5264 | TCGA-DD-AAEB | TCGA-BC-A10Q |
| TCGA-FV-A2QQ | TCGA-DD-AACM | TCGA-GJ-A6C0 | TCGA-DD-A4NP | TCGA-DD-AADM |
| TCGA-DD-AAVZ | TCGA-G3-A25W | TCGA-BC-A217 | TCGA-EP-A26S | TCGA-5R-AAAM |
| TCGA-O8-A75V | TCGA-BC-A69H | TCGA-DD-AACQ | TCGA-DD-A4NV | TCGA-G3-AAV1 |
| TCGA-RC-A6M3 | TCGA-2V-A95S | TCGA-DD-A1EK | TCGA-DD-AACE | TCGA-DD-A11D |
| TCGA-ED-A7PY | TCGA-EP-A3JL | TCGA-CC-A7IL | TCGA-ED-A7PZ | TCGA-DD-A3A9 |
| TCGA-DD-AAED | TCGA-2Y-A9H2 | TCGA-CC-5260 | TCGA-BW-A5NP | TCGA-BC-A10Z |
| TCGA-DD-A4ND | TCGA-DD-AAW3 | TCGA-G3-AAV6 | TCGA-G3-A25X | TCGA-BC-4073 |
| TCGA-DD-AADV | TCGA-ED-A5KG | TCGA-DD-A1EJ | TCGA-FV-A496 | TCGA-ED-A7PX |
| TCGA-DD-AADL | TCGA-5R-AA1C | TCGA-2Y-A9H8 | TCGA-DD-AADW | TCGA-CC-5259 |
| TCGA-G3-A7M6 | TCGA-MR-A8JO | TCGA-G3-A25Y | TCGA-NI-A8LF | TCGA-FV-A3I0 |
| TCGA-DD-AADG | TCGA-ED-A4XI | TCGA-DD-AAC8 | TCGA-DD-A113 | TCGA-UB-A7MA |
| TCGA-DD-AACB | TCGA-DD-AAE8 | TCGA-DD-A73B | TCGA-DD-AAVV | TCGA-2Y-A9H3 |
| TCGA-LG-A9QD | TCGA-DD-AADD | TCGA-2Y-A9GZ | TCGA-2Y-A9H9 | TCGA-KR-A7K2 |
| TCGA-CC-A9FS | TCGA-DD-A1EA | TCGA-DD-AACC | TCGA-2Y-A9H6 | TCGA-RC-A6M4 |
| TCGA-G3-AAV2 | TCGA-MR-A520 | TCGA-BC-A10U | TCGA-EP-A3RK | TCGA-DD-AAVU |
| TCGA-CC-A123 | TCGA-DD-AADS | TCGA-DD-A4NS | TCGA-ZP-A9D4 | TCGA-DD-A1ED |
| TCGA-DD-AAC9 | TCGA-5R-AA1D | TCGA-BC-A10W | TCGA-RC-A7SK | TCGA-DD-AAEH |
| TCGA-RC-A7SH | TCGA-DD-AACF | TCGA-DD-A4NR | TCGA-5C-A9VH | TCGA-G3-A25V |
| TCGA-DD-A4NI | TCGA-DD-A3A7 | TCGA-FV-A23B | TCGA-DD-AAD0 | TCGA-ZS-A9CD |
| TCGA-EP-A12J | TCGA-FV-A2QR | TCGA-G3-A25S | TCGA-2Y-A9GX | TCGA-EP-A2KC |
| TCGA-ED-A82E | TCGA-G3-A5SI | TCGA-DD-A3A1 | TCGA-DD-AADI | TCGA-FV-A4ZP |
| TCGA-CC-A3MB | TCGA-CC-A3MA | TCGA-DD-AADF | TCGA-DD-AAE7 | TCGA-BC-A10X |
| TCGA-DD-AACH | TCGA-DD-A1EE | TCGA-DD-A119 | TCGA-DD-AAD3 | TCGA-DD-AACD |
| TCGA-G3-A3CK | TCGA-CC-A5UC |              |              |              |

**Supplementary Table 2.** Kaplan-Meier, ROC and Concordance Index results of different regrouping methods

| Regrouping factor     | groups       | Kaplan–Meier Pvalue | AUC   | AUC 95% confidence interval | Pvalue of AUC | C-Index | 95% CI of C-Index | Pvalue of C-Index |
|-----------------------|--------------|---------------------|-------|-----------------------------|---------------|---------|-------------------|-------------------|
| <b>Gender</b>         |              |                     |       |                             |               |         |                   |                   |
|                       | Male         | <0.001              | 0.802 | 0.726-0.877                 | <0.001        | 0.733   | 0.673-0.794       | <0.001            |
|                       | Female       | 0.038               | 0.754 | 0.645-0.863                 | <0.001        | 0.646   | 0.568-0.723       | <0.001            |
| <b>Clinical stage</b> |              |                     |       |                             |               |         |                   |                   |
|                       | stage I      | 0.007               | 0.785 | 0.694-0.877                 | <0.001        | 0.727   | 0.651-0.804       | <0.001            |
|                       | stage II     | 0.842               | 0.646 | 0.466-0.826                 | 0.09          | 0.589   | 0.465-0.712       | 0.1590319         |
|                       | stage III&IV | <0.001              | 0.826 | 0.727-0.924                 | <0.001        | 0.709   | 0.637-0.782       | <0.001            |
| <b>Tumor grade</b>    |              |                     |       |                             |               |         |                   |                   |
|                       | G1&2         | <0.001              | 0.772 | 0.689-0.856                 | <0.001        | 0.695   | 0.632-0.759       | <0.001            |
|                       | G3&4         | <0.001              | 0.808 | 0.714-0.903                 | <0.001        | 0.727   | 0.653-0.8         | <0.001            |

**Supplementary Table 3.** The Subcellular Localization information of 3 prognostic biomarkers

| Symbol    | Category | Tissue            | Subcellular Localization | Validated Method/<br>Database | Prediction        | Tool        |
|-----------|----------|-------------------|--------------------------|-------------------------------|-------------------|-------------|
| GTPBP4    | mRNA     | Myeloma cell      | Cytosol                  | qRT-PCR                       | Cytosol/Cytoplasm | iLoc-mRNA   |
|           |          | Colon cancer cell | Nucleus                  | NGS                           |                   |             |
|           |          | HEK293 cell       | Ribosome                 | NGS                           |                   |             |
|           |          | K562              | Chromatin                | CSCD                          |                   |             |
|           |          |                   | Cytosol                  | CSCD                          |                   |             |
|           |          |                   | Nucleolus                | CSCD                          |                   |             |
|           |          |                   | Nucleoplasm              | CSCD                          |                   |             |
|           |          | HepG2             | Cytosol                  | CSCD                          |                   |             |
|           |          | HeLa-S3           | Nucleus                  | CSCD                          |                   |             |
| TREM-1    | mRNA     | Blood             | Exosome                  | exoRBase                      | Cytosol/Cytoplasm | iLoc-mRNA   |
|           |          |                   |                          |                               |                   |             |
| LINC00426 | LncRNA   | Blood             | Exosome                  | exoRBase                      | Cytosol/Cytoplasm | iLoc-LncRNA |



**Supplementary Table 4.** The list of seventeen enriched pathways related to genes that were co-expressed with 3 biomarkers from RNA prognostic biomarkers combination for liver cancer.

| Pathway                                                                                           | Number of genes | Fold Enrichment | P value* |
|---------------------------------------------------------------------------------------------------|-----------------|-----------------|----------|
| T cell receptor signaling pathway                                                                 | 10              | 14.9            | 1.50E-06 |
| Natural killer cell mediated cytotoxicity                                                         | 9               | 11.3            | 5.20E-05 |
| T Cytotoxic Cell Surface Molecules                                                                | 5               | 32.2            | 2.60E-04 |
| Lck and Fyn tyrosine kinases in initiation of TCR Activation                                      | 5               | 35.2            | 3.50E-04 |
| NO2-dependent IL 12 Pathway in NK cells                                                           | 5               | 22.8            | 8.00E-04 |
| Activation of Csk by cAMP-dependent Protein Kinase Inhibits Signaling through the T Cell Receptor | 5               | 17.6            | 1.80E-03 |
| Primary immunodeficiency                                                                          | 5               | 22.6            | 2.50E-03 |
| Cytokine-cytokine receptor interaction                                                            | 9               | 6               | 2.80E-03 |
| T Helper Cell Surface Molecules                                                                   | 4               | 25.8            | 3.60E-03 |
| Chemokine signaling pathway                                                                       | 8               | 6.6             | 4.00E-03 |
| IL 17 Signaling Pathway                                                                           | 4               | 20.6            | 6.30E-03 |
| The Co-Stimulatory Signal During T-cell Activation                                                | 4               | 16.3            | 1.10E-02 |
| IL12 and Stat4 Dependent Signaling Pathway in Th1 Development                                     | 4               | 14.7            | 1.40E-02 |
| Hematopoietic cell lineage                                                                        | 5               | 9               | 3.20E-02 |
| Cell adhesion molecules (CAMs)                                                                    | 6               | 6.5             | 3.60E-02 |
| HIV Induced T Cell Apoptosis                                                                      | 3               | 23.2            | 4.00E-02 |
| Fc gamma R-mediated phagocytosis                                                                  | 5               | 9.1             | 4.10E-02 |

\*P value by Benjamini–Hochberg corrections method

**Supplementary Table 5.** The bootstrap method calculating the AUC and the Concordance Index values to test the performance of all models

|                        | Mean of<br>AUC | 95% CI<br>of AUC | P value of<br>AUC* | C-<br>Index | 95% CI of<br>C-Index | P value of<br>C-Index* |
|------------------------|----------------|------------------|--------------------|-------------|----------------------|------------------------|
| <b>Our Model</b>       | 0.793          | 0.728-<br>0.858  | /                  | 0.685       | 0.622-0.749          | /                      |
| <b>3-gene Model</b>    | 0.76           | 0.695-<br>0.825  | <0.001             | 0.676       | 0.610-0.743          | 3.90E-01               |
| <b>45-gene Model</b>   | 0.613          | 0.533-<br>0.693  | <0.001             | 0.458       | 0.387-0.529          | 3.61E-05               |
| <b>ENSG00000086991</b> | 0.539          | 0.472-<br>0.606  | <0.001             | 0.497       | 0.426-0.569          | 3.52E-05               |
| <b>ENSG00000137857</b> | 0.543          | 0.472-<br>0.614  | <0.001             | 0.482       | 0.414-0.55           | 9.03E-06               |
| <b>ENSG00000160867</b> | 0.541          | 0.468-<br>0.614  | <0.001             | 0.563       | 0.496-0.631          | 2.53E-03               |
| <b>ENSG00000140443</b> | 0.547          | 0.466-<br>0.628  | <0.001             | 0.493       | 0.415-0.571          | 6.22E-05               |
| <b>ENSG00000234912</b> | 0.566          | 0.486-<br>0.646  | <0.001             | 0.52        | 0.443-0.597          | 2.43E-04               |
| <b>ENSG00000237438</b> | 0.643          | 0.566-<br>0.720  | <0.001             | 0.597       | 0.524-0.67           | 2.93E-02               |
| <b>ENSG00000255874</b> | 0.639          | 0.562-<br>0.716  | <0.001             | 0.611       | 0.543-0.68           | 4.51E-02               |
| <b>ENSG00000234608</b> | 0.575          | 0.503-<br>0.647  | <0.001             | 0.537       | 0.469-0.605          | 4.92E-04               |
| <b>hsa-mir-9-3</b>     | 0.629          | 0.538-<br>0.720  | <0.001             | 0.586       | 0.517-0.654          | 1.25E-02               |
| <b>hsa-mir-10b</b>     | 0.579          | 0.500-<br>0.658  | <0.001             | 0.564       | 0.498-0.631          | 7.39E-03               |
| <b>hsa-mir-31</b>      | 0.506          | 0.374-<br>0.638  | <0.001             | 0.532       | 0.447-0.616          | 1.01E-03               |
| <b>hsa-mir-519c</b>    | 0.478          | 0.305-<br>0.651  | <0.001             | 0.527       | 0.404-0.65           | 1.08E-02               |
| <b>hsa-mir-522</b>     | 0.47           | 0.332-<br>0.608  | <0.001             | 0.612       | 0.505-0.718          | 1.12E-01               |
| <b>hsa-mir-3660</b>    | 0.44           | 0.388-<br>0.492  | <0.001             | 0.721       | 0.601-0.841          | 7.19E-01               |
| <b>hsa-mir-4784</b>    | 0.558          | 0.429-<br>0.687  | <0.001             | 0.524       | 0.420-0.629          | 2.24E-03               |
| <b>hsa-mir-326</b>     | 0.579          | 0.487-<br>0.671  | <0.001             | 0.574       | 0.499-0.649          | 8.01E-03               |

|                      |       |                 |        |       |             |          |
|----------------------|-------|-----------------|--------|-------|-------------|----------|
| <b>hsa-mir-3677</b>  | 0.657 | 0.582-<br>0.732 | <0.001 | 0.609 | 0.535-0.683 | 2.37E-02 |
| <b>hsa-mir-511</b>   | 0.53  | 0.461-<br>0.599 | <0.001 | 0.488 | 0.413-0.564 | 3.64E-05 |
| <b>hsa-mir-9-1</b>   | 0.626 | 0.536-<br>0.716 | <0.001 | 0.586 | 0.516-0.655 | 1.29E-02 |
| <b>hsa-mir-9-2</b>   | 0.632 | 0.546-<br>0.718 | <0.001 | 0.593 | 0.526-0.66  | 1.72E-02 |
| <b>7-miRNA Model</b> | 0.632 | 0.551-<br>0.713 | <0.001 | 0.592 | 0.523-0.661 | 1.64E-02 |

---

**Notes:**

\*The *t*-test for the model and our model
