# Supplementary material for: An Integrating Immune-Related Signature to Improve Prognosis of Hepatocellular Carcinoma
Source: Hindawi journal article supplement (doi:10.1155/2020/8872329), 2020-11-03
Supplement: f1 [file 8872329.f1.zip]

# ***Supplementary Material***

——*Supplementary Source code*

**An integrating immune-related signature to improve prognosis of hepatocellular carcinoma**

Rui Zhu,<sup>1,2</sup> Wenna Guo,<sup>3</sup> Xin-Jian Xu,<sup>1</sup> and Liucun Zhu<sup>2</sup>

<sup>1</sup> Department of Mathematics, Shanghai University, Shanghai, 200444, China.

<sup>2</sup> School of Life Sciences, Shanghai University, Shanghai, 200444, China.

<sup>3</sup> School of Life Sciences, Zhengzhou University, Zhengzhou, Henan, 450001, China.

Correspondence should be addressed to Liucun Zhu; zhuliucun@shu.edu.cn and Xin-Jian Xu; xinjxu@shu.edu.cn

## Supplementary Source code:

ROC analysis source code. A new Perl script which was a lot more efficient to complete traversing all possible combinations and calculating the area under the Receiver operating characteristic curve (AUC).

```
#!/usr/bin/perl
use strict;
use warnings;

use Getopt::Long;
use Pod::Usage;

use List::Util qw/sum/;

my $input_file;
my $exp_file;
my $out_file;

my $man = 0;
my $help = 0;

GetOptions(
    'help|?'    => \$help,
    'man'       => \$man,
    'input=s'   => \$input_file,
    'exp=s'     => \$exp_file,
    'output=s'  => \$out_file,
) or pod2usage(2);

pod2usage(1) if $help;
pod2usage( -exitstatus => 0, -verbose => 2 ) if $man;

$|++;

#-----
#load combinations
#-----

open( COMB, "< $input_file" ) or die "cannot open combination file: $input_file\n";
my %coef;
while (my $comb_line = <COMB>){
    chomp $comb_line;
```

```

        my ($combs, $coefs) = split /\t/, $comb_line;
        $coef{$combs} = $coefs;
    }
close COMB;
#-----

#-----
#load exp file
#-----

open( EXP, "< $exp_file") or die "cannot open $exp_file $!\n";

my $sample_row = <EXP>;
my @sample_names = split /\t/, $sample_row;
shift @sample_names;

my $group_row = <EXP>;
my @groups = split /\t/, $group_row;
shift @groups;
map { $_ = 0 if $_ == 2 } @groups;

my %groups;
my $datas;
my $sample_cnt;

while ( my $row = <EXP> ){
    chomp $row;
    my @data = split /\t/, $row;
    my $name = shift @data;
    $sample_cnt = ( @data );

    my $i = 0;
    while ($i < $sample_cnt){
        unless ($groups[$i] == -1){
            $groups{$sample_names[$i]} = $groups[$i];
            $datas->{$name}->{$sample_names[$i]} = $data[$i];
        }
        $i++;
    }
}

close EXP;
#-----

```

```
#-----  
#risk score & ROC  
#-----
```

```
open(OUT, "> $out_file") or die "cannot create $out_file\n";
```

```
foreach my $comb ( keys %coef ){  
    my @markers = split /\+/, $comb;  
    my @coefs = split /,/, $coef{$comb};  
  
    my $i = 0;  
    my %coefficient;  
    while ( $i < (scalar @markers)) {  
        $coefficient{$markers[$i]} = $coefs[$i];  
        $i++;  
    }  
  
    my %scores;  
  
    foreach my $sample ( keys %groups ) {  
        my $score = 0;  
        foreach my $m (@markers){  
            $score += ( $coefficient{$m} * ($datas->{$m}->{$sample}) );  
        }  
        $scores{$sample} = $score;  
    }  
  
    my @samples = sort { $scores{$a} <=> $scores{$b} } keys %scores;  
    $i = 0;  
    while ( $i < (@samples) ){  
        my %temp = ( $samples[$i] => $groups{$samples[$i]} );  
        my $same_k = 1;  
        while ( $i+$same_k < (@samples) ){  
            if( $scores{$samples[$i]} == $scores{$samples[$i+$same_k]}){  
                $temp{$samples[$i+$same_k]} = $groups{$samples[$i+$same_k]};  
            }else{  
                last;  
            }  
            $same_k++;  
        }  
  
        if( $same_k > 1){  
            my @temp = sort { $temp{$a} <=> $temp{$b} } keys %temp;  
            splice @samples, $i, $same_k, @temp;  
        }  
    }  
}
```

```

    }

    $i += $same_k;
}

my $positive_cnt = 0;
my $rank = 1;
my $rank_sum = 0;

while ($rank <= (@samples)){
    if($groups{$samples[$rank-1]}){
        $positive_cnt++;
        $rank_sum += $rank;
    }
    $rank++;
}

my $negative_cnt = (@samples) - $positive_cnt;
my $auroc = ($rank_sum - $positive_cnt * ($positive_cnt+1)/2) / $negative_cnt /
$positive_cnt;

print OUT "$comb\t$auroc\t$coef{$comb}\n";

}

close OUT;
#-----

```
