# Supplementary material for: An Integrating Immune-Related Signature to Improve Prognosis of Hepatocellular Carcinoma
Source: Comput Math Methods Med. 2020 Nov 3;2020:8872329. doi: 10.1155/2020/8872329 (PMC7655255; doi:10.1155/2020/8872329)
Supplement: Supplementary Materials — Supplementary Figure 1: Kaplan-Meier and the ROC curves in different clinical stages. Supplementary Figure 2: Kaplan-Meier and the ROC curves in different pathological grades. Supplementary Figure 3: Kaplan-Meier and the ROC curves in the GEO validation dataset. Supplementary Figure 4: histogram of differential expressions of the 3 RNA prognostic biomarkers in different clinical stages. Supplementary Figure 5: the scatter plot of immune cell infiltration analysis. Supplementary Table 1: the accession codes of TCGA of the 377 HCC specimens. Supplementary Table 2: Kaplan-Meier, ROC, and concordance index results of different regrouping methods. Supplementary Table 3: the subcellular localization information of 3 prognostic biomarkers. Supplementary Table 4: the list of seventeen enriched pathways related to genes that were coexpressed with 3 biomarkers. Supplementary Table 5: the bootstrap method calculating the AUC and the concordance index values to test the performance of all models. Supplementary Source code: ROC analysis source code. A new Perl script which was a lot more efficient to complete traversing all possible combinations and calculating the area under the receiver operating characteristic curve (AUC). [file 8872329.f1.zip]

Archive with 2 entries (2 files):
- Supplementary_Material(Figure_Table).pdf
- Supplementary_Material(Source_code).pdf
